# Supplementary material
Source: PubMed Central journal article supplement (PMC6153789)
Supplement: zac010187488s1.pdf [file zac010187488s1.pdf]

# Novel potent capsid assembly modulators regulate multiple steps of the Hepatitis B virus life-cycle

Thomas Lahlali<sup>1</sup>, Jan Martin Berke<sup>2</sup>, Karen Vergauwen<sup>2</sup>, Adrien Foca<sup>1</sup>, Koen Vandyck<sup>2</sup>,  
Frederik Pauwels<sup>2</sup>, Fabien Zoulim<sup>1,3</sup>, and David Durantel<sup>1,\*</sup>

<sup>1</sup>INSERM, U1052, Cancer Research Center of Lyon (CRCL), Université de Lyon (UCBL1), CNRS UMR\_5286, Centre Léon Bérard, Lyon, France;

<sup>2</sup>Janssen Research & Development, Beerse, Belgium;

<sup>3</sup>Liver Unit, Hospices Civils de Lyon (HCL), Lyon, France.

**\*Correspondence:** David Durantel, PhD, HDR

**Mailing address:** INSERM U1052, 151 cours Albert Thomas, 69424 Lyon Cedex 03, France.

**Phone:** + 33 4 72 68 19 70; **Fax:** +33 4 72 68 19 71; **E-mail:** [david.durantel@inserm.fr](mailto:david.durantel@inserm.fr)

**Supplementary figures and figure legends**

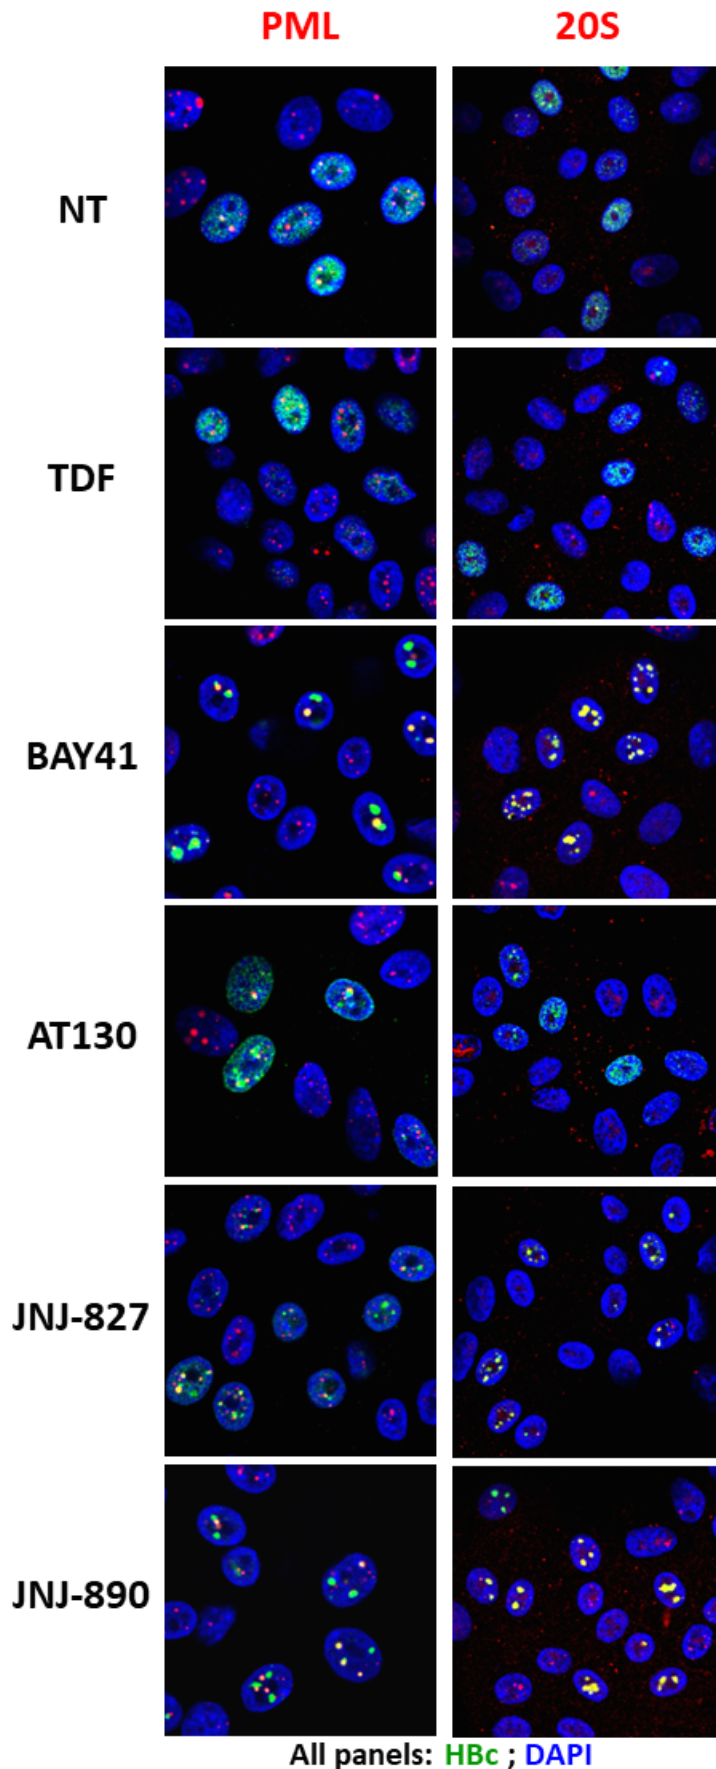

**Supplementary figure 1. Effect of JNJ-827 and JNJ-890 on subnuclear localisation of capsids.** Differentiated HepaRG were infected with HBV (500 vge/mL), then treated starting at day 7 post-infection (p.i.) for 7 days every two or three other days (3 treatments) with 10  $\mu$ M of indicated compounds. Protein subcellular distribution was evaluated by immunofluorescence. At the end of the treatment procedure, cells were fixed by 2% PFA and stained with indicated primary antibodies and with fluorescently labeled secondary antibodies. An antibody recognizing only assembled capsid was used (ab8637). Green: HBc; red: PML (Promyelocytic Leukemia) protein or 20S (proteasomal 20 subunit); blue: DAPI. The pictures are representatives of 3 independent experiments.

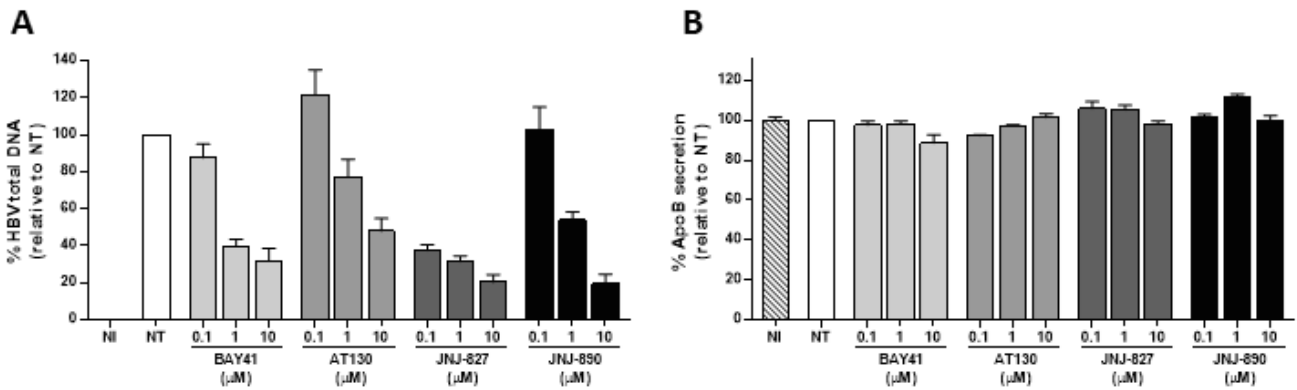

2 **Supplementary figure 2. Dose-response effect of JNJ-827 and JNJ-890 in infected dHepaRG**  
 3 **cells.** dHepaRG cells were infected with HBV (200 vge/cell), cultured for one week then  
 4 treated 7 days (treatment each 2/3 days) with 0.1, 1 or 10 μM of indicated compound. (A)  
 5 Intracellular HBV total DNA level was quantified by qPCR. (B) ApoB secretion levels were  
 6 assessed by ELISA. Results are the mean + SEM of n=3.

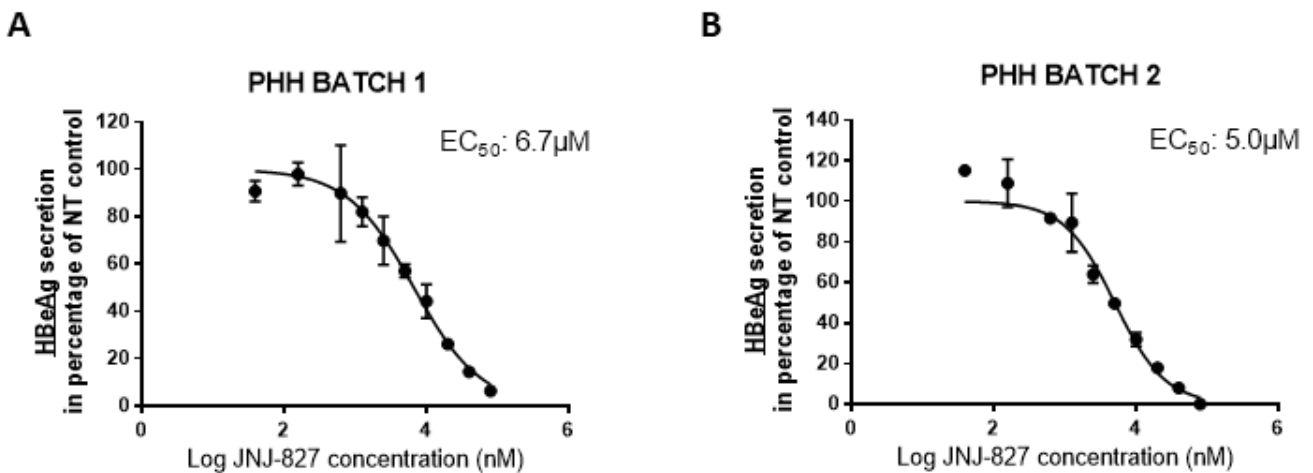

11  
 12  
 13 **Supplementary figure 3. Determination of JNJ-827 EC<sub>50</sub> on HBeAg secretion.** PHH were  
 14 infected with HBV (200 vge/mL), cultivated for 5 days post infection, treated three times for  
 15 7 days (treatment each 2/3 days) with increasing amount of JNJ-827 ranging from 40 nM to  
 16 80 μM. HBeAg levels in cell culture supernatant were monitored by ELISA. Results obtained  
 17 with 2 different PHH donors/batches are represented independently.

20  
21

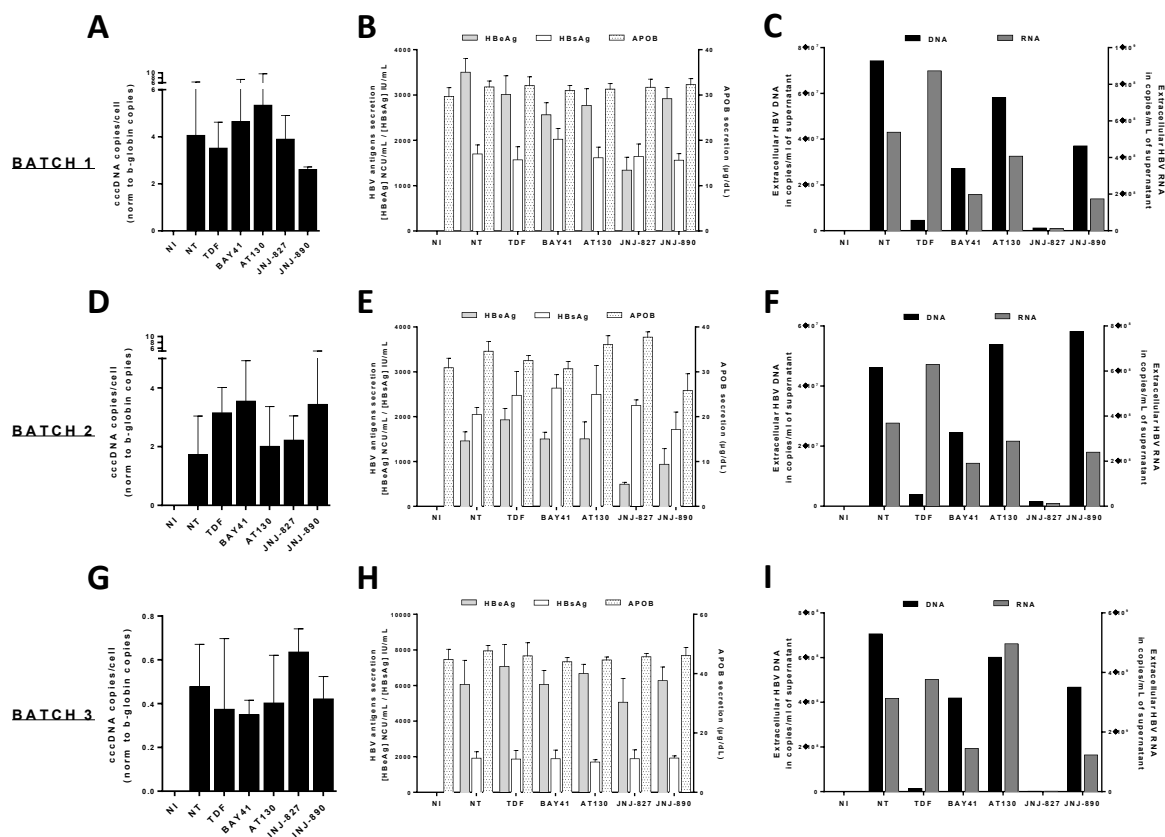

22  
23  
24

25 **Supplementary figure 4. Antiviral properties of JNJ-827 and JNJ-890 in primary human**  
26 **hepatocytes.** PHH were mock (NI condition) or infected with HBV (200 vge/mL), cultivated  
27 during 5 days post infection, then non-treated (NT condition) or treated three times for 7  
28 days (treatment every 2/3 days) with 10  $\mu$ M of indicated compound. (A, D, G) CccDNA, was  
29 quantified by qPCR. (B, E, H) HBeAg, HBsAg and ApoB levels in cell culture supernatant were  
30 monitored by ELISA. (C, F, I) Extracellular HBV DNA and RNA levels were quantified by qPCR  
31 or RT-qPCR after nucleic acid extraction from supernatant. Results obtained with 3 different  
32 PHH donors/batches are represented independently. Results are the mean + SD of technical  
33 replicates (n=2 or 3).

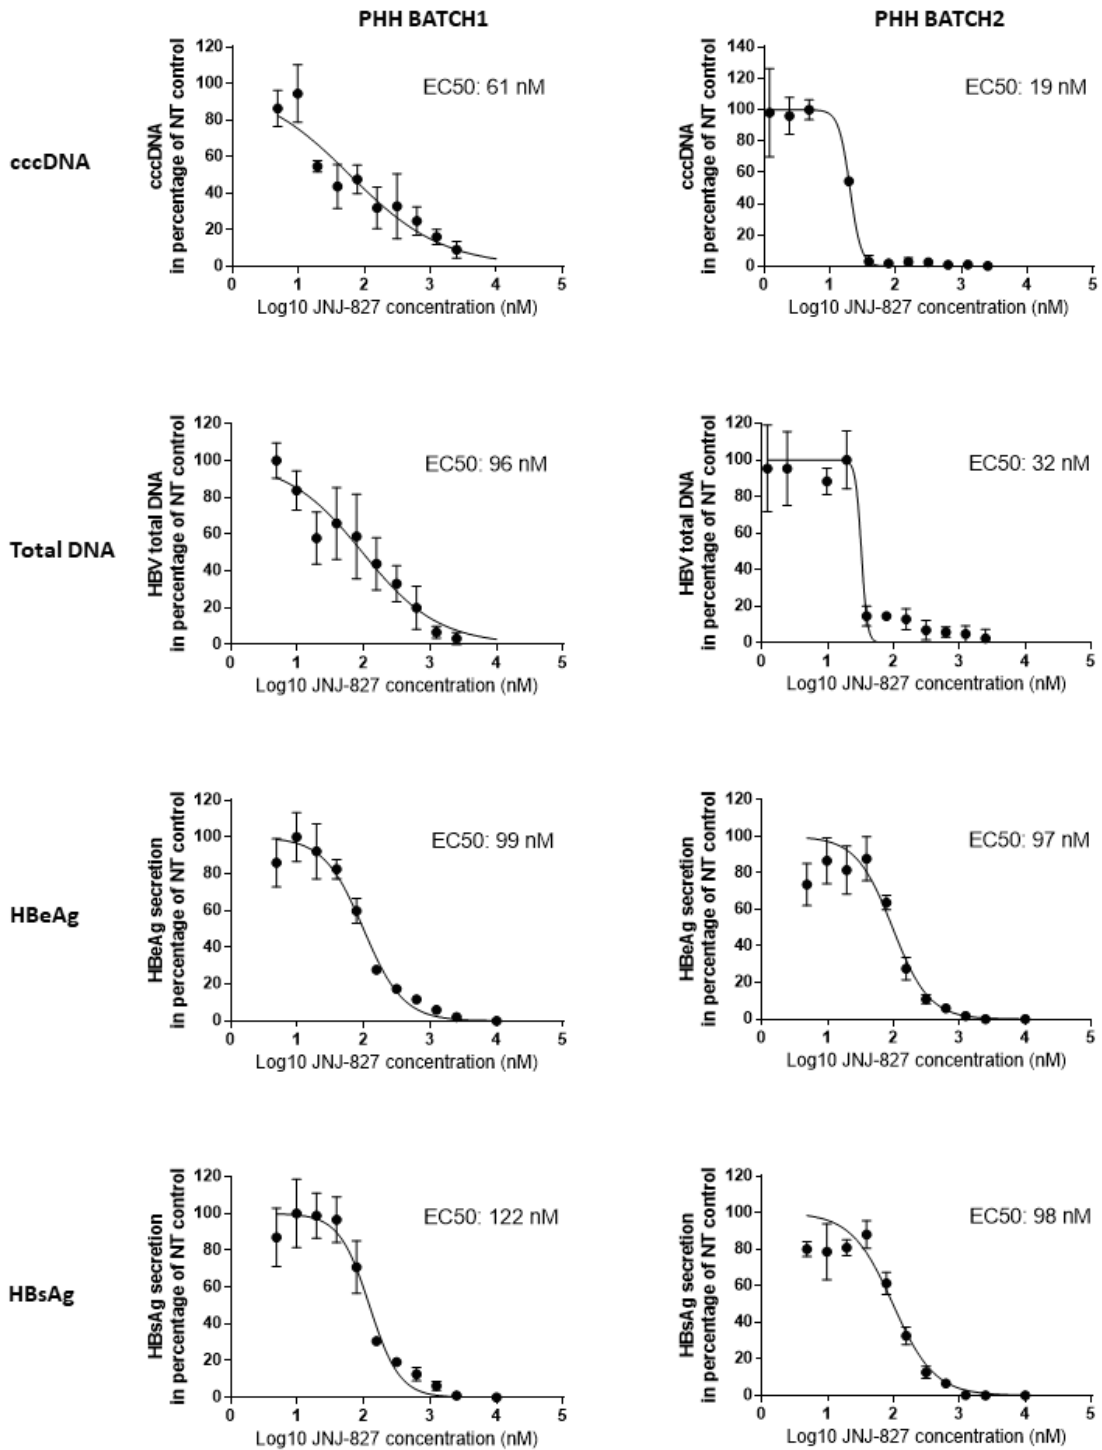

34

35 **Supplementary figure 5. Determination of JNJ-827 EC<sub>50</sub> on cccDNA establishment.** PHH  
 36 were pre-treated for 24h with increasing amount of JNJ-827 ranging from 5 nM to 10  $\mu$ M  
 37 then inoculated with HBV (200 vge/mL) in presence of drug for 24h. One day after infection,  
 38 medium was changed and cells were cultured for one week. Intracellular cccDNA and HBV  
 39 total DNA levels were quantified by qPCR FRET and qPCR respectively. HBeAg and HBsAg

40 levels in cell culture supernatant were monitored by ELISA. Results obtained with 2 different  
 41 PHH donors/batches are represented independently.

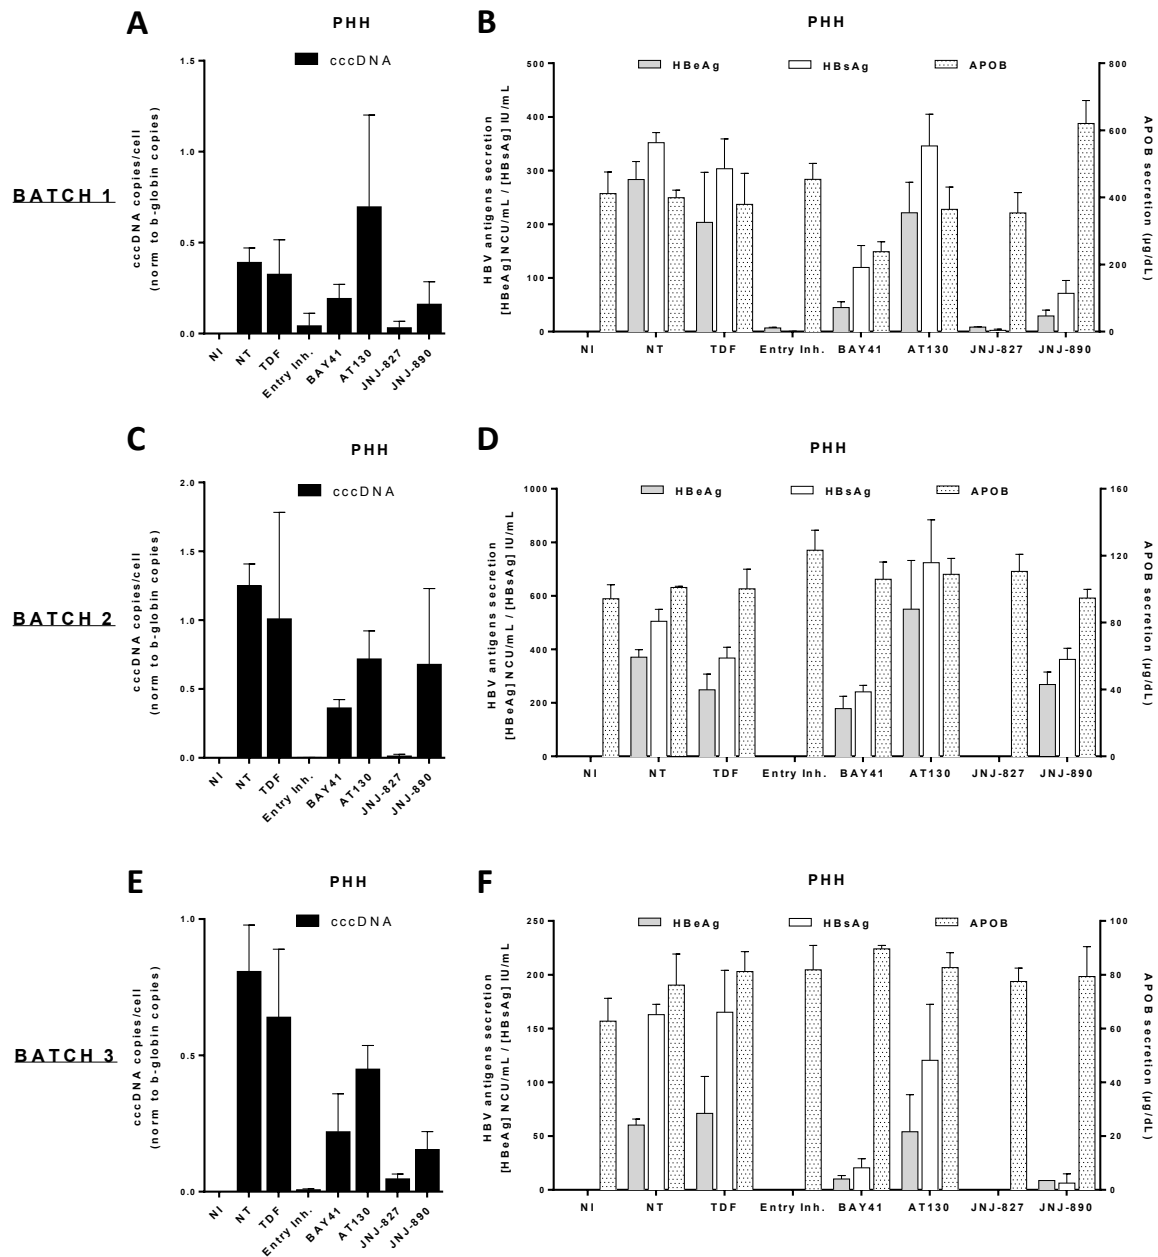

42  
 43 **Supplementary figure 6. Effect of JNJ-827 and JNJ-890 on HBV infection establishment in**  
 44 **PHH.** PHH cells were pre-treated for 24h with 10 µM of indicated CAMs or 100 nM of preS1  
 45 peptide entry inhibitor, then inoculated with HBV (200 vge/mL) in presence of drug for 24h.  
 46 One day after infection, medium was changed and cells were cultured for one week. For the  
 47 TDF control, cells were treated twice after infection. A non-infected (NI) control was  
 48 included. (A, C, E) CccDNA, was quantified by qPCR. (B, D, F) HBeAg, HBsAg and ApoB levels  
 49 in cell culture supernatant were monitored by ELISA. Results obtained with 3 different PHH

50 donors/batches are represented independently. Results are the mean + SD of technical  
 51 replicates (n=2 or 3).  
 52  
 53

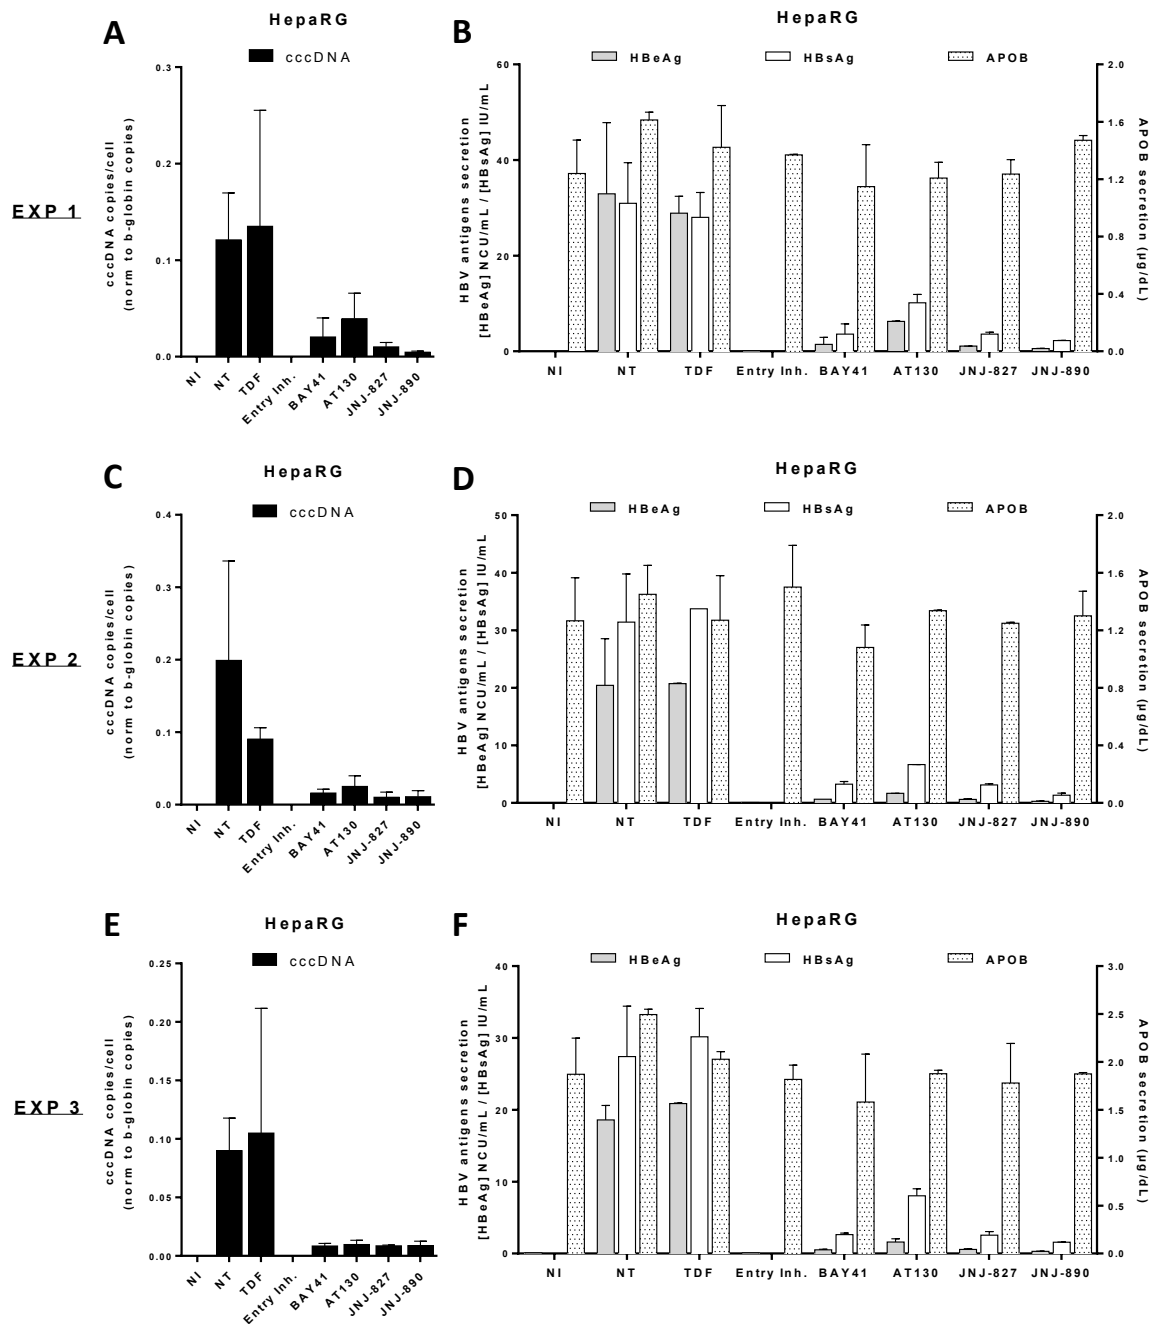

54  
 55 **Supplementary figure 7. Effect of JNJ-827 and JNJ-890 on HBV infection establishment in**  
 56 **dHepaRG.** Differentiated HepaRG cells were pre-treated for 24h with 10 µM of indicated  
 57 CAMs or 100 nM of preS1 peptide entry inhibitor, then inoculated with HBV (200 vge/mL) in  
 58 presence of drug for 24h. One day after infection, medium was changed and cells were

59 cultured for one week. For the TDF control, cells were treated twice after infection. A non-  
 60 infected (NI) control was included. (A, C, E) CccDNA, was quantified by qPCR. (B, D, F)  
 61 HBeAg, HBsAg and ApoB levels in cell culture supernatant were monitored by ELISA. Results  
 62 obtained with 3 different HepaRG differentiations are represented independently. Results  
 63 are the mean + SD of technical replicates (n=2 or 3).

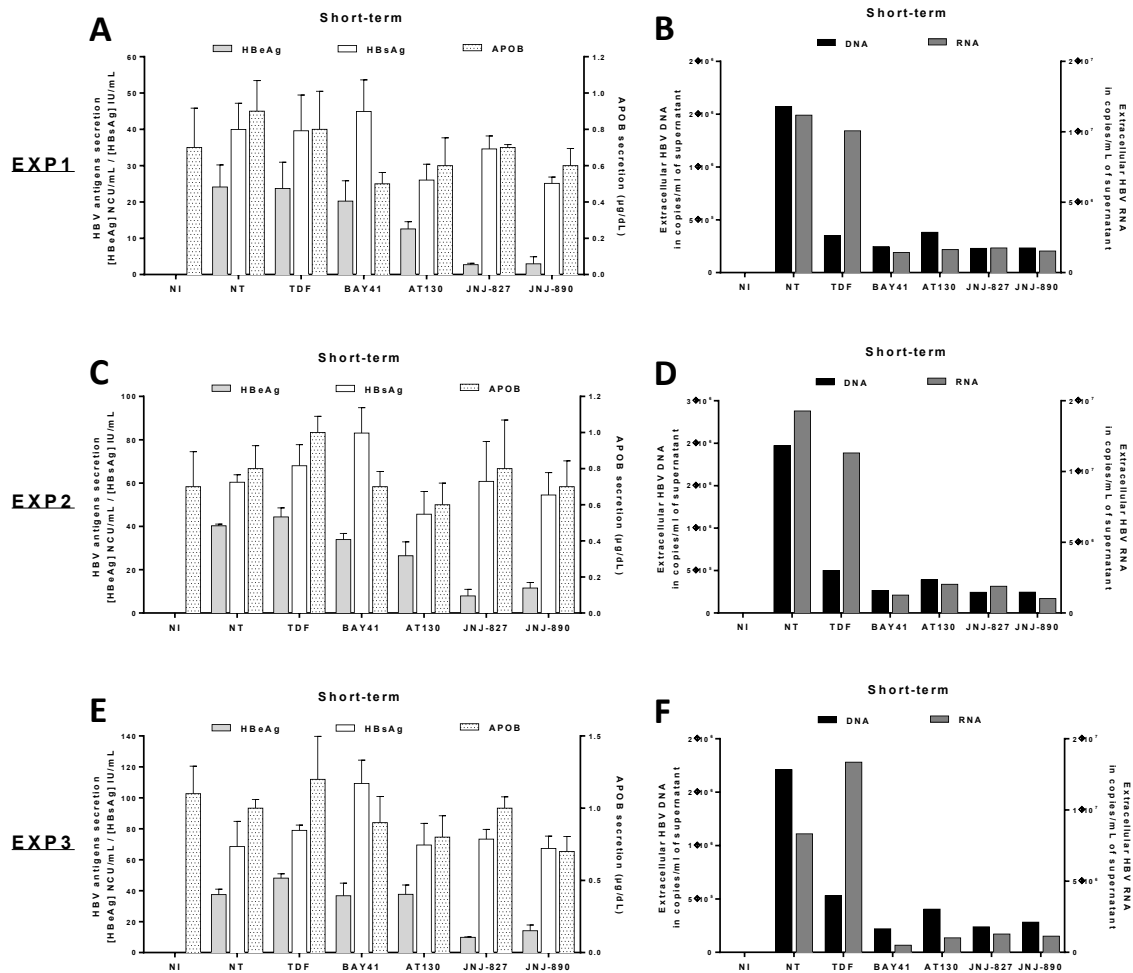

64  
 65  
 66 **Supplementary figure 8. Antiviral properties of JNJ-827 and JNJ-890 in dHepaRG: short**  
 67 **versus long-term treatment; Part 1: short-term results.** dHepaRG were infected with HBV  
 68 (200 vge/mL), cultured during one week then treated for 7 days (treatment each 2/3 days; 3  
 69 treatments in total) with 10 µM of indicated compound. The antiviral effects of the  
 70 compounds were monitored at end point. (A, C, E) HBeAg, HBsAg and ApoB levels in cell  
 71 culture supernatant were monitored by ELISA. (B, D, F) Extracellular HBV DNA and RNA  
 72 levels were quantified by qPCR or RT-qPCR after nucleic acid extraction from supernatant.  
 73 Results obtained with 3 different HepaRG differentiations are represented independently.  
 74 Results are the mean + SD of technical replicates (n=2 or 3).

75



76  
77  
78  
79  
80  
81

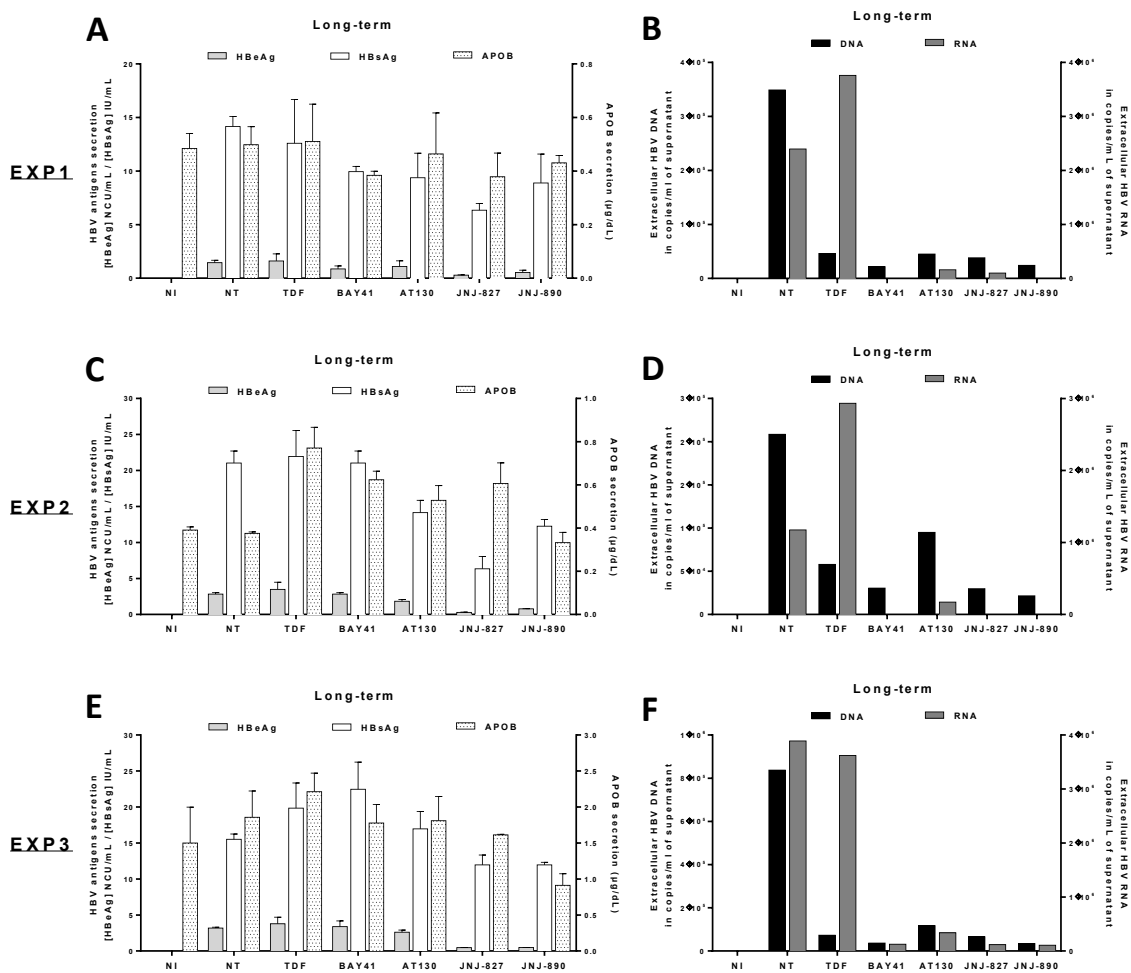

82  
83  
84  
85  
86  
87  
88  
89  
90  
91  
92

**Supplementary figure 9. Antiviral properties of JNJ-827 and JNJ-890 in dHepaRG: short versus long-term treatment; Part 2: long-term results.** dHepaRG were infected with HBV (200 vge/mL), cultured during one week then treated for one month (treatment each 2/3 days; 15 treatments in total) with 10 µM of indicated compound. The antiviral effects of the compounds were monitored at end point. (A, C, E) HBeAg, HBsAg and ApoB levels in cell culture supernatant were monitored by ELISA. (B, D, F) Extracellular HBV DNA and RNA levels were quantified by qPCR or RT-qPCR after nucleic acid extraction from supernatant. Results obtained with 3 different HepaRG differentiations are represented independently. Results are the mean + SD of technical replicates (n=2 or 3).

93

94

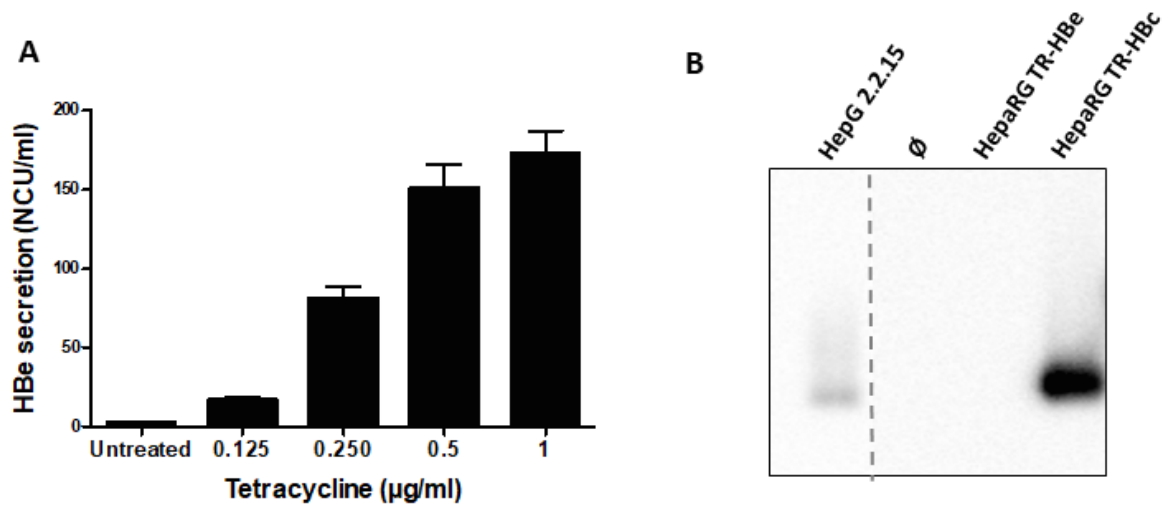

95

96 **Supplementary figure 10. Characterization of the HepaRG-TR-HBe cell line.** (A) The  
97 secretion of HBeAg by cells was done by ELISA on supernatant recovered 48 hours after  
98 induction of gene expression by the indicated concentration of tetracycline. (B) Capsid  
99 migration assay. HepaRG TR-HBe and a positive control expressing HBc, HepaRG-TR-HBc,  
100 were induced using 1 µg/mL of tetracyclin for 48hrs. Cell lysates were loaded in a native  
101 agarose gel for visualization of intracellular capsid formation. Capsid formation was  
102 monitored by immunoblotting using an anti-HBc antibody.

103

104
